# Supplementary material for: PARP1 allows proper telomere replication through TRF1 poly (ADP-ribosyl)ation and helicase recruitment
Source: PubMed Central journal article supplement (PMC9981704; doi:10.1038/s42003-023-04596-6), 2023-03-02
Supplement: 42003_2023_4596_MOESM3_ESM.pdf [file 42003_2023_4596_MOESM3_ESM.pdf]

## **Description of Additional Supplementary Files**

File Name: Supplementary Data 1

Description: Numerical Source data

File Name: Supplementary Data 2

Description: Numerical Source data
